# Supplementary material
Source: Springer Nature journal article supplement (http://www.springermedizin.de/resource/supplementary/12955_2005_236_MOESM2_ESM.pdf/9559990)

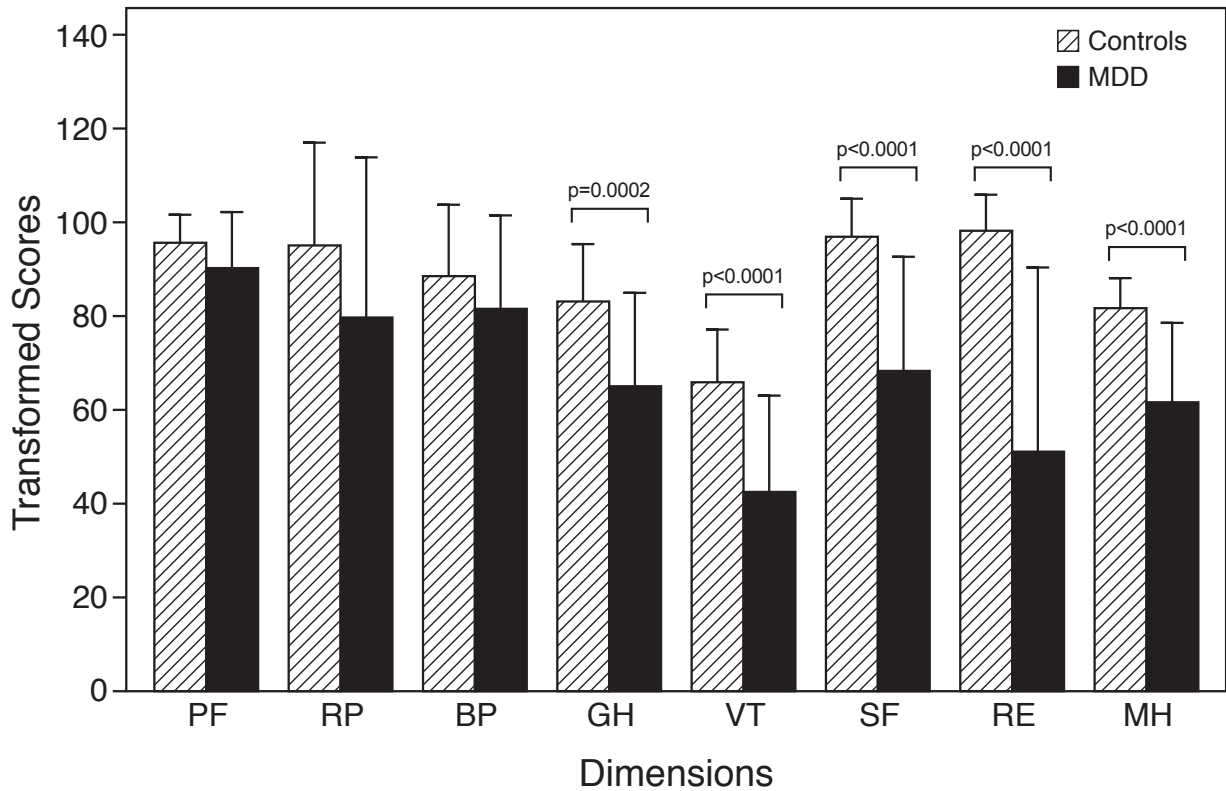

Supplement: MOESM2 [file 9559990]
